# Supplementary material for: Gut microbiota in experimental murine model of Graves’ orbitopathy established in different environments may modulate clinical presentation of disease
Source: PubMed Central journal article supplement (PMC5970527; doi:10.1186/s40168-018-0478-4), 2018-05-25

# Additional file 5: Figure S1

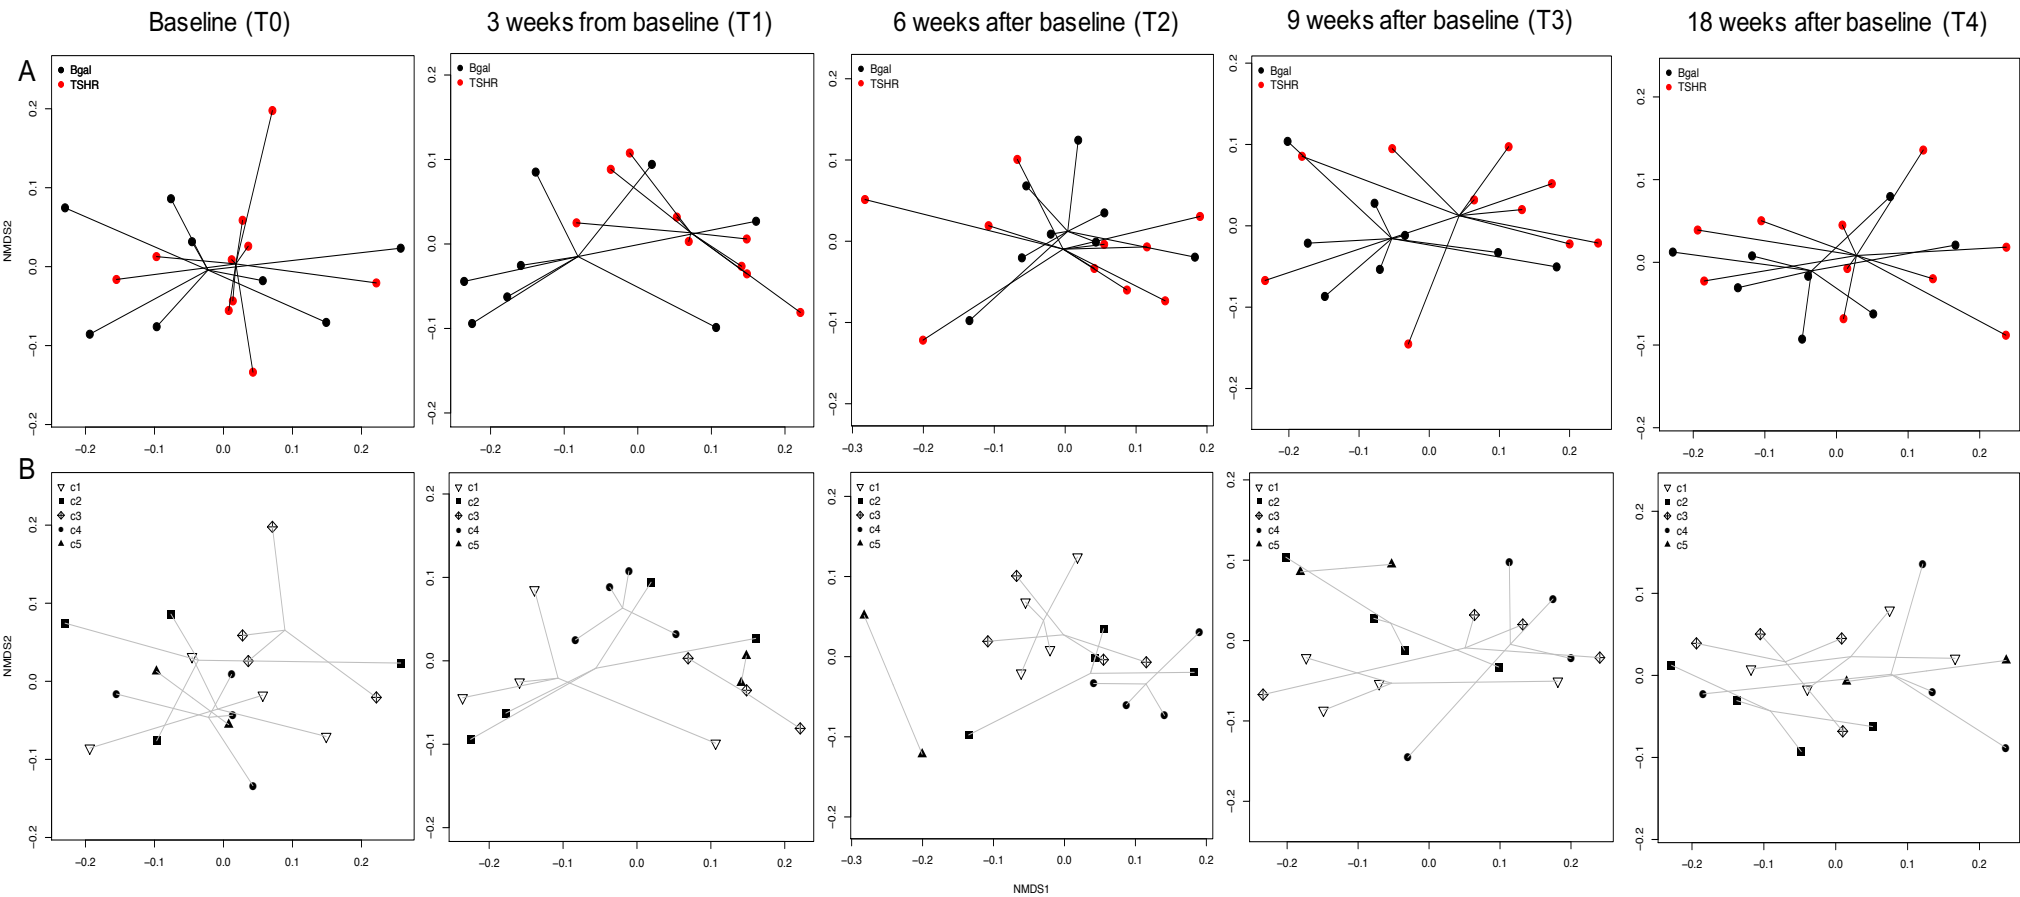

Supplement: 40168_2018_478_MOESM5_ESM.pdf [file 40168_2018_478_MOESM5_ESM.pdf]
